# Supplementary material
Source: PubMed Central journal article supplement (PMC3943318)
Supplement: supp_2013.092254_2013.092254.Labopin_suppl.pdf [file supp_2013.092254_2013.092254.Labopin_suppl.pdf]

# Cost-effectiveness and clinical outcomes of double versus single cord blood transplantation in adults with acute leukemia in France

Myriam Labopin,<sup>1,21,22\*</sup> Annalisa Ruggeri,<sup>2,3,22\*</sup> Norbert Claude Gorin,<sup>4</sup> Eliane Gluckman,<sup>2</sup> Didier Blaise,<sup>5</sup> Lionel Mannone,<sup>6</sup> Noel Milpied,<sup>7</sup> Ibrahim Yakoub-Agha,<sup>8</sup> Eric Deconinck,<sup>9</sup> Mauricette Michallet,<sup>10</sup> Nathalie Fegueux,<sup>11</sup> Gerard Socié,<sup>12</sup> Stephanie Nguyen,<sup>13</sup> Jean Yves Cahn,<sup>14</sup> Thierry de Revel,<sup>15</sup> Federico Garnier,<sup>16</sup> Catherine Faucher,<sup>16</sup> Namik Taright,<sup>17</sup> Chantal Kenzey,<sup>2</sup> Fernanda Volt,<sup>2</sup> Dominique Bertrand,<sup>18</sup> Mohamad Mohty,<sup>1,21,22</sup> and Vanderson Rocha<sup>2,20</sup> on behalf of Eurocord and Société Française de Greffe de Moelle et de Thérapie Cellulaire (SFGM-TC).

<sup>1</sup>Sorbonne Universités, UPMC Univ Paris 06, UMR-S938, CDR Saint-Antoine, Paris, France; <sup>2</sup>Eurocord, Hôpital Saint Louis, University Paris VII, France; <sup>3</sup>Rome Transplant Network, University Tor Vergata, Rome, Italy; <sup>4</sup>Saint Antoine Hospital, UPMC Univ Paris 06, UMR-S938, CEREST-TC EBMT, Paris, France; <sup>5</sup>Paoli Calmettes Hospital, Marseille, France; <sup>6</sup>L'Archet Hospital, Nice, France; <sup>7</sup>Haut-Lévêque Hospital, Pessac, France; <sup>8</sup>Claude Huriez Hospital, Lille, France; <sup>9</sup>Jean Minjot Hospital, Besancon, France; <sup>10</sup>E. Herriot Hospital, Lyon, France; <sup>11</sup>Lapeyronie Hospital, Montpellier, France; <sup>12</sup>Saint Louis Hospital, Paris, France; <sup>13</sup>Pitié Salpetriere Hospital, Paris, France; <sup>14</sup>Albert Michallon Hospital, Grenoble, France; <sup>15</sup>Percy Hospital, Clamart, France; <sup>16</sup>Agence de la Biomedecine, Paris, France; <sup>17</sup>DIM, Paris, France; <sup>18</sup>Centre National Gestion, Paris, France; <sup>19</sup>CHU Nantes, Hematology Department, Nantes, France; <sup>20</sup>Churchill Hospital, University of Oxford, UK; <sup>21</sup>INSERM, UMR-S938, CDR Saint-Antoine, Paris, France; and <sup>22</sup>Hématologie Clinique et Thérapie Cellulaire, Hôpital Saint-Antoine, Paris, France

\*ML and AR contributed equally to this work.

---

©2014 Ferrata Storti Foundation. This is an open-access paper. doi:10.3324/haematol.2013.092254

Manuscript received on May 27, 2013. Manuscript accepted on October 14, 2013.

Correspondence: annalisa.ruggeri@sat.aphp.fr

## Supplemental Methods

To estimate cost-effectiveness, which was the primary outcome of the study, we analyzed clinical outcomes and the cost of the transplant procedures.

We analyzed clinical results and cost of UCBT in 134 consecutive patients transplanted for AL in CR1. UCBT were performed in 26 French transplant centres between 2002 and 2009. All patients received a single or a double unmanipulated CB unit as their first graft, after myeloablative (MAC) or reduced intensity conditioning regimen (RIC). The Institution Review Board of Eurocord-Netcord scientific committee approved this study. Transplant centres performed single or double UCBT according to their centre policies. The main endpoint for clinical outcome was overall survival (OS). MAC was defined as a regimen containing either total body irradiation (TBI) with a dose greater than 6 Gy, a dose of oral busulfan greater than 8 mg/kg, or a dose of intravenous busulfan greater than 6.4 mg/kg.

## Clinical Outcomes

The primary endpoint was overall survival (OS). The secondary endpoints studied were leukemia free survival (LFS) neutrophil recovery, graft versus host disease (GVHD), relapse (RI) and non-Relapse Mortality (NRM). OS was defined as the time elapsed from allo-SCT to death, regardless of the cause of death. LFS was defined as survival with no evidence of relapse. NRM was defined as death without evidence of relapse. Patient-, disease-, and transplant-related variables of the sUCBT and dUCBT were compared, using Chi-square or Fischer exact test for categorical variables and Mann-Whitney test for continuous variables. Cumulative incidence functions (CIF) were used to estimate RI and NRM in a competing risks setting, since death and relapse are competing together.(24, 25) In order to study acute and

chronic GVHD, we considered death in remission as a competing event. Probabilities of LFS and OS were calculated using the Kaplan-Meier estimate. Univariate analyses were done using log rank test for OS and LFS, Gray's test for CIF. Multivariate analyses were performed using Cox proportional-hazard model.(26) Factors differing between two groups in terms of distribution and all factors significantly associated with one of the outcome studied were included in the model. All tests are two-sided with type I error rate fixed at 0.05. Statistical analyses were performed with SPSS 19 (SPSS Inc, Chicago, IL), and R 2.13.2 (R Development Core Team, Vienna, Austria) software packages.

#### Outcomes and economic data collection

Data on patients, graft characteristics, and outcomes were collected using the Eurocord forms (registration 100 days, CBU infusion and yearly follow-up forms). For the purpose of this study, each transplant center was requested to complete missing data on length of hospitalization and update patient's follow-up. All hospital costs were estimated from donor search to 1 year after UCBT, according to the French public health system. Major resources considered were stem cell procurement, initial hospitalization for transplantation, all further readmissions to the hospital in transplant unit and outpatient clinics. The cost for the CBU search and graft acquisition included expenses related to donor samples request, sample typing, and the actual cost of the CB unit. The cost of the individual CBU was provided by the French national donor registry (Agence de la Biomédecine). The costs of graft acquisition were highly dependent on the country and the cord blood banks delivering the graft and are listed in supplemental table 2 (Data as for 2010 from Agence de la Biomédecine). The information on number and duration of hospitalizations were collected through the

national health care administrative data (defined as PMSI in France) and through an additional questionnaire sent to each participating center. Daily cost of each hospitalization was estimated using the average cost published by the French National Scale Costs. Each center participating to the French National Scale Costs reports yearly all the individual costs related to the procedure. The details of the resources considered are listed in supplemental table 3, including all treatment procedures, housekeeping, human resources, supplies, room costs, and overhead costs including maintenance, logistics, administration, billing, and amortization. The costs were obtained from analytic accounting system of French hospitals. Costs pertaining to pre-transplant clinical biologic and radiologic evaluation of recipient, family HLA-typing, rehabilitation facilities after transplantation and indirect costs, such as transportation, loss of incomes, etc, were not taken in consideration.

Resources were estimated in euros (€), adjusted to the 2010 French consumer price index.

#### Cost-effectiveness analysis

The cost-effectiveness was estimated by the ICER (Incremental cost effectiveness ratio), which represents the additional cost generated by an additional QALY (quality adjusted life years). ICER per capita was calculated by dividing ICER by French GDP per capita in 2010. Following the recommendation of the World Health Organization, GDP was used as the indicator to derive the categories of cost-effectiveness.(27, 28)

Cost-effectiveness of health technology was defined as follow: 1) very cost-effective: ICER below the per capita GDP; 2) cost-effective: ICER between one and three times per capita GDP; 3) not cost-effective: ICER above three times per capita GDP.

The QALY is the way to compare claims for finite healthcare resources and one

QALY corresponds to one year spent in perfect health.(27) The ICER is the difference between average costs divided by the difference in average effects. Events occurring after transplantation that were considered for their impact on quality of life were the occurrence of chronic GVHD and disease relapse. A Markov(28) decision analysis model was used to calculate the ICER within 4 years. For cost-effectiveness analysis, RIC and MAC were studied separately. The model started at 1 year post transplantation and allowed 36 cycles of 1 month each. At any time point, the model considered a patient to be in one of the 4 following clinical states: alive and well, alive with chronic GVHD, alive in relapse, and death. For the Markov model, only cGVHD occurring prior to relapse was considered for the cGVHD group. Patients who experienced relapse prior to cGVHD were considered to be in the "relapse group"

Patients who developed cGVHD prior to relapse were initially considered in the group "cGVHD"; once the relapse occurred they were, then, considered in "relapse group". In order to calculate the QALY, time spent in each state was weighted for the quality of life experienced while in that state.(29) The utility values used were 0.979, 0.9, 0.5 and 0.0 for the four health states, respectively. They were derived from the literature to define the states of "alive without complication" and "alive with cGvHD". For relapse, the utility value was estimated using the "standard gamble question" asked to 10 transplant physicians. All transitional probabilities included in the model were estimated on our population.

Sensitivity analyses were conducted around some of the utility values used to weigh survival to calculate QALYs. The utility values for the health states 'alive without complication' ranged from 0.8 to 1, for health state 'alive with GVHD' ranged from 0.7 to 1, for health state 'relapse' ranged from 0.3 to 0.7. After performing the Markov

cohort analysis, we conducted a first-order Monte Carlo microsimulation of 1000 trials to obtain point estimates, 95th percentile confidence intervals (95% CI), for cost and QALYs.

Cost effectiveness analyses (CEA) were done with TreeAge Pro 2012 Software, Inc., Williams-town, Massachusetts.

**Supplemental Table 1. Cost and cost effectiveness of HSCT- review of the literature**

| <i>Country</i>  | <i>Authors; year</i> | <i>Nr of patients</i> | <i>Type of transplant</i> | <i>Period study</i>    | <i>Total cost/ patient</i> |
|-----------------|----------------------|-----------------------|---------------------------|------------------------|----------------------------|
| USA             | Welch HG; 1989       | 41                    | allogeneic BMT            | 5 years                | 193 000 USD                |
|                 |                      |                       |                           |                        |                            |
| France          | Dufoir T; 1992       | 40                    | allogeneic BMT            | 5 years                | 424 696 FF                 |
|                 |                      |                       |                           |                        |                            |
| Canada          | Barr R,1996          | 18                    | allogeneic BMT            | 18 months              | 100 600 CAND               |
|                 |                      |                       |                           |                        |                            |
| USA             | Lee SJ; 2000         | 181                   | allogeneic SCT            | 100 days               | 105300 USD                 |
|                 |                      |                       |                           |                        |                            |
| Norvege         | Mishra V; 2001       | 17                    | 10 MSD, 7UD               | 1 year                 | 106 825 USD                |
|                 |                      |                       |                           |                        |                            |
| The Netherlands | van Agthoven M; 2002 | 97                    | HLA id PBSCT              | 2 years                | 98977 Euros                |
|                 |                      |                       | HLA id BMT                | 2 years                | 98334 Euros                |
|                 |                      |                       | UD transplantation        | 2 years                | 151745 Euros               |
|                 |                      |                       |                           |                        |                            |
| France          | Cordonnier C; 2005   | 23                    | 12 MAC                    | 1 year                 | 64600 Euros                |
|                 |                      |                       | 11 NMA                    | 1 year                 | 60000 Euros                |
|                 |                      |                       |                           |                        |                            |
| France          | Espérou H; 2005      | 85                    | MRD MAC                   | 6 months               | 76237 Euros                |
|                 |                      |                       |                           |                        |                            |
| Japan           | Yu YB ; 2006         | 18                    | allogeneic PBSCT          | whole treatment period | 76423 USD                  |
|                 |                      |                       |                           |                        |                            |
| Sweden          | Svahn BM; 2006       | 93                    | 36 MSD, 57 UD             | 5 years                | 139414 Euros               |
|                 |                      |                       |                           |                        |                            |
| USA             | Saito AM; 2007       | 132 MRD,<br>143 UD    | 185 MAC                   | 1 year                 | 128253 USD                 |
|                 |                      |                       | 90 RIC                    | 1 year                 | 80499 USD                  |
|                 |                      |                       |                           |                        |                            |
| USA             | Saito AM; 2008       | 315                   | 158 MDS, 157 UD           | 1 year                 | 128800 USD                 |
|                 |                      |                       |                           |                        |                            |
| USA             | Majhail NS; 2009     | 294                   | 121 MRD                   | 100 days               | 83583 USD                  |
|                 |                      |                       | 173 UCBT                  | 100 days               | 137564 USD                 |
|                 |                      |                       |                           |                        |                            |
| USA             | Majhail NS; 2013     | 1320                  |                           | 100 days               | 203026 USD                 |

**Supplemental Table 2 : Cost of Cord Blood Units by country and cord blood banks (without shipping costs)**

| Country     | City or CBB         | Price of one CB Unit (2010) |
|-------------|---------------------|-----------------------------|
| France      |                     | 10 000 €                    |
| GERMANY     | Düsseldorf ZKRD     | 21 000 €                    |
| BELGIUM     | MBPB                | 22 450 €                    |
|             | Leuven              | 20 000 €                    |
| SPAIN       | REDMO               | 23 500 €                    |
|             | BCB Barcelone       | 23 000 €                    |
| FINLAND     |                     | 22 491 €                    |
| ITALY       |                     | 17 462 €                    |
| NETHERLANDS |                     | 22 450 €                    |
| SWITZERLAND |                     | 25 385 €                    |
| ENGLAND     | A.NOLAN             | 21 000 GBP                  |
|             | BBMR                | 19 051 GBP                  |
| AUSTRALIA   |                     | 39 000 AUD                  |
| ISRAEL      | Haddasah            | 26 000 USD                  |
|             | Sheba               | 22 000 USD                  |
| TAIWAN      | Healthbanks Biotech | 10 000 USD                  |
|             | BIONET Corp         | 4 500 USD                   |
| USA         | CRIR Cryobanks Intl | 28 800 USD                  |
|             | Gift of Life        | 20 000 USD                  |
|             | Colorado -Aurora    | 25 000 USD                  |
|             | Michigan            | 32 000 USD                  |
|             | New-York            | 35 000 USD                  |
|             | Paramus             | 25 000 USD                  |
|             | Stem Cyte Inter.    | 32 000 USD                  |
|             | Gainesville         | 29 490 USD                  |
|             | Denver              | 29 490 USD                  |
|             | San Diego           | 24 240 USD                  |



|  |                      |            |
|--|----------------------|------------|
|  | St Louis             | 29 805 USD |
|  | Glenview             | 32 115 USD |
|  | San Antonio          | 34 215 USD |
|  | Orange               | 24 765 USD |
|  | Camden               | 42 615 USD |
|  | Grand Rapids         | 37 365 USD |
|  | Seattle              | 36 840 USD |
|  | Arcadia              | 34 165 USD |
|  | Detroit              | 37 365 USD |
|  | Durham               | 37 365 USD |
|  | Altamonte Springs    | 36 840 USD |
|  | Allendale            | 42 615 USD |
|  | Houston              | 35 790 USD |
|  | Seattle              | 36 840 USD |
|  | Glenview             | 32 115 USD |
|  | Orlando              | 37 365 USD |
|  | Boca Rocton          | 23 715 USD |
|  | Aurora               | 32 115 USD |
|  | Taipei -Taiwan       | 34 165 USD |
|  | New-York             | 40 585 USD |
|  | Warrensville Heights | 37 995 USD |

**Supplemental Table 3. Resources and expenses taken in account by the French National Scale of Costs**

|                                                            |                                                                           |
|------------------------------------------------------------|---------------------------------------------------------------------------|
| Clinical analysis expenses                                 | Clinical expenses including personnel, maintenance and amortization       |
|                                                            | Intensive care expenses including personnel, maintenance and amortization |
|                                                            | Monitoring costs including personnel, maintenance and amortization        |
|                                                            | Resuscitation expenses including personnel, maintenance and amortization  |
| Medico-technical expenses                                  | Emergency service expenses including personnel and ambulance services     |
|                                                            | Dialysis expenses including personnel                                     |
|                                                            | Laboratory expenses including personnel                                   |
|                                                            | Operating Room expenses including personnel                               |
|                                                            | Radiology/Radiotherapy expenses including personnel                       |
|                                                            | Anaesthesiology expenses including personnel                              |
|                                                            | Other medical-technical expenses                                          |
| General logistics and managerial expenses                  | Laundry                                                                   |
|                                                            | Food/Restaurant services                                                  |
|                                                            | General administrative services                                           |
|                                                            | Personnel administration                                                  |
|                                                            | Patient receptionist service                                              |
|                                                            | Room and boarding services                                                |
|                                                            | Maintenance                                                               |
|                                                            | Patient transport other than ambulance                                    |
| Patient navigation service (stretcher, wheelchair, etc...) |                                                                           |
| Medical logistics expenses                                 | Pharmacy                                                                  |
|                                                            | Sterilization                                                             |
|                                                            | Biomedical engineering                                                    |

|                    |                                                        |
|--------------------|--------------------------------------------------------|
|                    | Hygiene and surveillance                               |
|                    | Other medical logistics                                |
| Follow-up expenses | Pharmaceutical specialties billable charges            |
|                    | Pharmaceutical specialties in addition to non-billable |
|                    | Blood products                                         |
|                    | Drugs                                                  |
|                    | Other medical consumables                              |
|                    | Medical outsourcing. medical imaging                   |
|                    | Medical outsourcing. laboratories                      |
|                    | Ambulance subcontracting                               |
|                    | Medical outsourcing. hospitalization outside hospital  |
|                    | Medical outsourcing. other                             |
|                    | Fees of outside medical personnel                      |
|                    | Cost of medical act                                    |
|                    | Comprehensive                                          |
